# Supplementary material for: A sustainable, high ionic conductivity, semi-interpenetrating double-network ionogel film composed of phosphorylated corn straw-derived cellulose and polyaspartamide derivatives
Source: Royal Society of Chemistry journal article supplement (doi:10.1039/d4nj05054a), 2025-01-01
Supplement: d4nj05054a1.pdf [file d4nj05054a1.pdf]

## Supporting information

### **A sustainable, high ionic conductivity, semi-interpenetrating double-network ionogel film composed of phosphorylated corn straw-derived cellulose and polyaspartamide derivatives**

*Bo Wang,<sup>1a</sup> Shuai Xie,<sup>1a</sup> Yan Li,<sup>a</sup> Meiqing Fan,<sup>b</sup> Xu Zeng,<sup>a</sup> Hong Zhang,<sup>a</sup> Yue Cao,<sup>a</sup> Xin Zhang,<sup>\*a</sup> Bo Ren,<sup>\*a</sup> and Xiao Dong Yang<sup>\*a</sup>*

*<sup>a</sup>Jilin Provincial Key Laboratory of Straw-Based Functional Materials, Institute for Interdisciplinary Biomass Functional Materials Studies, Jilin Engineering Normal University, Changchun 130052, P. R. China.*

*<sup>b</sup>Measurement Biotechnology Research Center, College of Food Engineering, Jilin Engineering Normal University, Changchun, 130052, PR China*

*\* zhangxin0422@jleu.edu.cn, ren20121217@126.com, y86908051@126.com.*

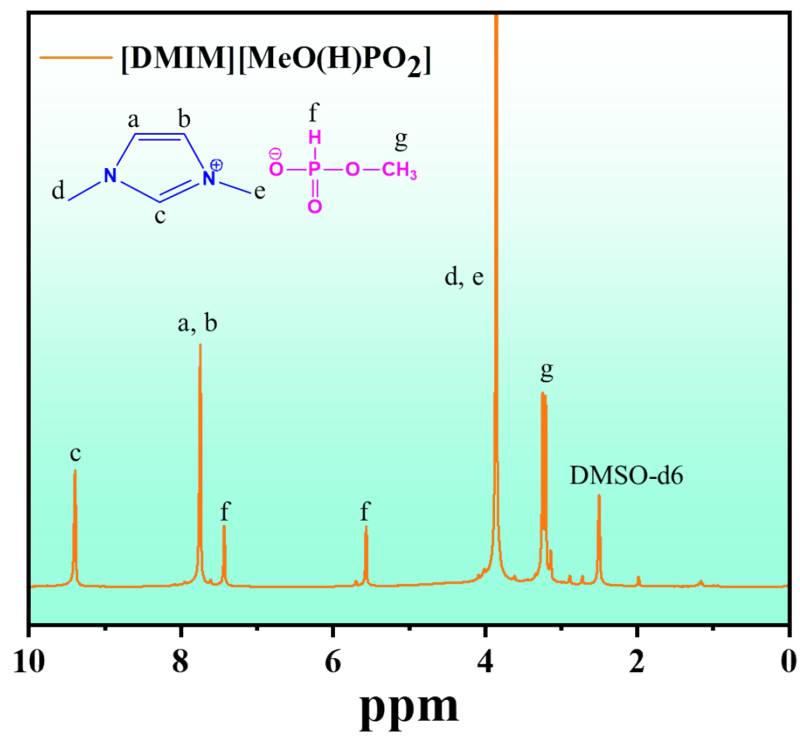

**Figure S1.**  $^1\text{H}$  NMR spectra of  $[\text{DMIM}][\text{MeO}(\text{H})\text{PO}_2]$  ionic liquid.

**Table S1.** A comparative analysis of diverse cellulose-based ionic films

| Category                                                                          | Ionic Conductivity (mS/cm) | Voltage (V) | Ref.      |
|-----------------------------------------------------------------------------------|----------------------------|-------------|-----------|
| AE-Cel                                                                            | 2.8                        | 1.5         | This work |
| C-pHEMA/C-p-cellulose-[DMIm][(MeO)(H)PO <sub>2</sub> ] : BMIM TFSI (9 : 1) PIL_IL | 2.6                        | 2.5         | [S1]      |
| PEG-CNC-NaTFSI solid polymer electrolyte                                          | 2.34                       | -           | [S2]      |
| Cellulose/Methylcellulose gel                                                     | 4.36                       | -           | [S3]      |
| CNF/PEG gel                                                                       | 0.61                       | -           | [S4]      |
| Cellulose-PDC organogels                                                          | 4.14                       | -           | [S5]      |
| Cellulose/Chitosan                                                                | 2.1                        | 2           | [S6]      |
| MxG-CNC-g-PPMA                                                                    | 0.71                       | -           | [S7]      |
| PS-r-PMMA <sub>s</sub>                                                            | 0.98                       | -           | [S8]      |

- S1 H. H. Rana, J. H. Park, G. S. Gund and H. S. Park, Highly conducting, extremely durable, phosphorylated cellulose-based ionogels for renewable flexible supercapacitors, *Energy Storage Mater.*, 2020, **25**, 70-75.
- S2 S. Atifi, C. Miao, M. N. Mirvakili, W. Y. Hamad, On the ionic conductivity and mechanical behavior of cellulose-based electrolytes: Applications for rechargeable batteries, *Colloid Surface A.*, 2024, **686**, 133322.
- S3 F. Yu, H. B. Zhang, L. Z. Zhao, Z. P. Sun, Y. L. Li, Y. Mo, Y. Chen, A flexible cellulose/methylcellulose gel polymer electrolyte endowing superior Li<sup>+</sup> conducting property for lithium ion battery, *Carbohydr. Polym.*, 2020, **246**, 116622.
- S4 Z. Wang, P. Heasman, J. Rostami, T. Bensefelt, M. Linares, H. Li, A. Iakunkov, F. Sellman, R. Östmans, M. M. Hamed, I. Zozoulenko, L. Wågberg, Dynamic networks of cellulose nanofibrils enable highly conductive and strong polymer gel electrolytes for lithium-ion batteries, *Adv. Funct. Mater.*, 2023, **33**, 2212806.
- S5 H. Jia, K. Jimbo, K. Mayumi, T. Oda, T. Sawada, T. Serizawa, T. Araki, N. Kamimura, E. Masai, E. Togawa, M. Nakamura, T. Michinobu, Ionic conductive organogels based on cellulose and lignin-derived metabolic intermediates, *ACS Sustainable Chem. Eng.*, 2024, **12**, 501-511.
- S6 Z. Wang, J. Liu, J. Zhang, S. Hao, X. Duan, H. Song, J. Zhang, Novel chemically cross-linked chitosan-cellulose based ionogel with self-healability, high ionic conductivity, and high thermo-mechanical stability, *Cellulose*, 2020, **27**, 5121-5133.
- S7 R. Kato, J. H. Lettow, S. N. Patel, S. J. Rowan, Ion-conducting thermoresponsive films based on polymer-grafted cellulose nanocrystals, *ACS Appl. Mater. Interfaces*, 2020, **12**, 54083-54093.
- S8 Y. M. Kim, D. G. Seo, H. Oh, H. C. Moon, A facile random copolymer strategy to achieve highly conductive polymer gel electrolytes for electrochemical applications, *J. Mater. Chem. C.*, 2019, **7**, 161-169
